# Supplementary material for: Screening, Linkage to Care and Treatment of Hepatitis C Infection in Primary Care Setting in the South of Italy
Source: MDPI journal article supplement (doi:10.3390/life10120359), 2020-12-18
Supplement: s1 [file s1]

**Table S1. Criteria for identification of the patients with high risk of hepatitis C virus (HCV).**

| <b>Criteria of the high-risk hepatitis C virus (HCV) patients</b>                                                                 | <b>ICD9-CM codes for diagnosis</b>                            | <b>Laboratory values</b>            | <b>%<sup>1</sup></b> |
|-----------------------------------------------------------------------------------------------------------------------------------|---------------------------------------------------------------|-------------------------------------|----------------------|
| Diagnosis of chronic liver disease (chronic hepatitis or alcohol liver disease, nonalcoholic steatohepatitis) excluding cirrhosis | 5710, 5713, 5714, 57140, 57141, 57149, 5718, 5719, 5710, 5711 |                                     | 79,3                 |
| Elevated transaminases                                                                                                            |                                                               | AST > 68 U/l<br>or/and ALT > 75 U/l | 10,7                 |
| Diagnosis of lymphoma                                                                                                             | 201xx e 202xx                                                 |                                     | 5,5                  |
| Chronic hepatitis B (HBV) infection                                                                                               | 070.2x, 070.3x                                                |                                     | 5,2                  |
| Diagnosis of cirrhosis                                                                                                            | 571, 5712, 5715, 5716                                         |                                     | 2,3                  |
| Positive hepatitis C antibody test without quantitative HCV RNA test                                                              | 070.41, 070.44, 070.51, 070.54, 070.7, 070.70, 070.71         |                                     | 1,8                  |
| Diagnosis of hepatocellular carcinoma                                                                                             | 155                                                           |                                     | 0,5                  |
| Human immunodeficiency virus (HIV) infection                                                                                      | 042xx, 044xx, 079.53, V08                                     |                                     | 0,5                  |
| Hemoglobinopathies                                                                                                                | 28261, 28262, 28263, 2827                                     |                                     | 0,5                  |
| Acute and subacute necrosis of liver                                                                                              | 570                                                           |                                     | 0,4                  |
| Current or prior hemodialysis                                                                                                     | V56.0                                                         |                                     | 0,3                  |
| Cryoglobulinemia                                                                                                                  | 273.2                                                         |                                     | 0,1                  |

<sup>1</sup> Percentage calculated on patients at high risk of HCV (N=2 614)

**Table S2.** Patients already treated, referred and not referred to specialist care for direct-acting antiviral (DAA) treatment stratified by chronic liver disease.

|                                                                                | <b>HCV patients without<br/>advanced liver disease</b> | <b>HCV patients with<br/>advanced liver disease</b> | <b>p value</b> |
|--------------------------------------------------------------------------------|--------------------------------------------------------|-----------------------------------------------------|----------------|
|                                                                                | <b>N = 496</b>                                         | <b>N = 202</b>                                      |                |
|                                                                                | <b>%</b>                                               | <b>%</b>                                            |                |
| <b>Referred to the specialist<br/>centre, treated and<br/>responded to DAA</b> | 37.1                                                   | 42.1                                                | 0.21           |
| <b>Referred to the specialist<br/>centre for DAA treatment</b>                 | 18.4                                                   | 19.8                                                | 0.67           |
| <b>Not treated with DAA<br/>and not referred to the<br/>specialist centre</b>  | 44.5                                                   | 38.1                                                | 0.13           |

**Note:** HCV, hepatitis C virus.
